# Supplementary material
Source: bioRxiv or medRxiv preprint supplement (https://www.biorxiv.org/highwire/filestream/131784/field_highwire_adjunct_files/2/361105-3.pdf)
Supplement: Supplementary file [file 361105-3.pdf]

## Disc Margin

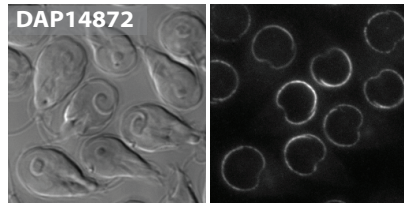

**DAP14872**  
ankyrin repeat

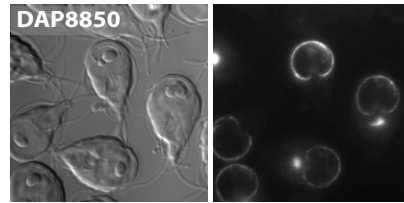

**DAP8850**  
ankyrin repeat

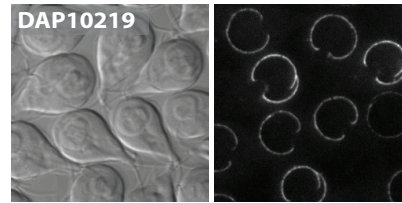

**DAP10219**  
ankyrin repeat

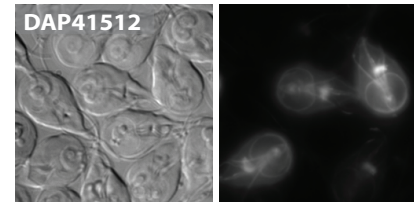

**DAP41512**  
DUF1126

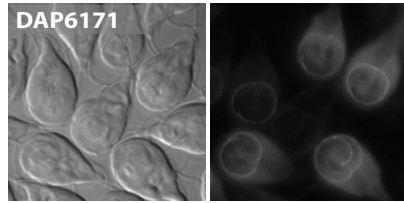

**DAP6171**  
novel

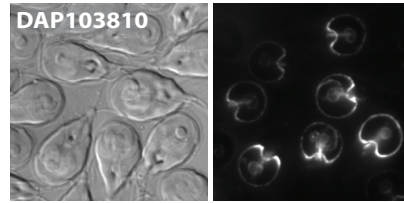

**DAP103810**  
ankyrin repeat

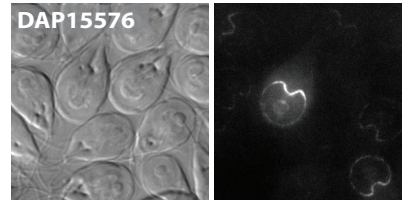

**DAP15576**  
ankyrin repeat

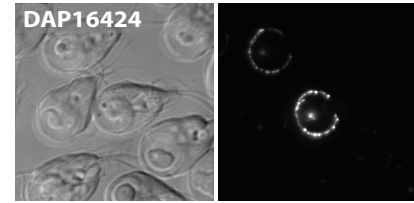

**DAP16424**  
Mlf1IP

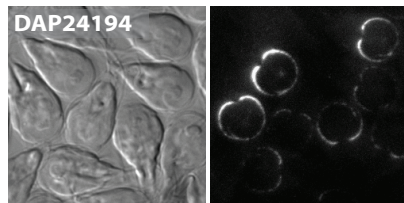

**DAP24194**  
ankyrin repeat

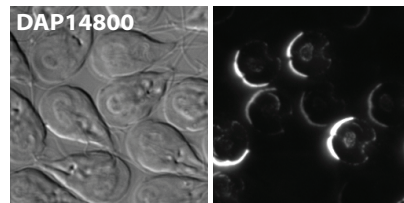

**DAP14800**  
ankyrin repeat

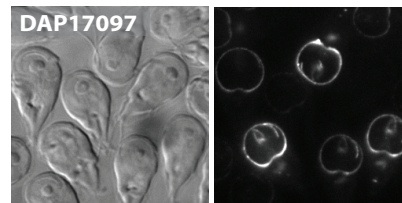

**DAP17097**  
ankyrin repeat

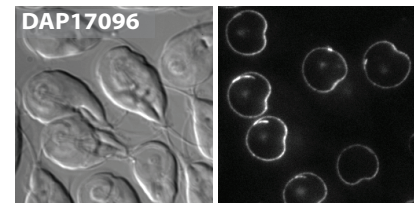

**DAP17096**  
ankyrin repeat

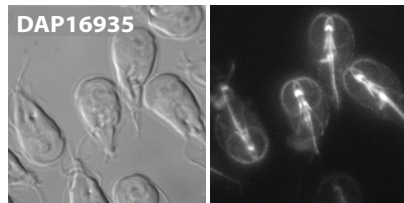

**DAP16935**  
novel

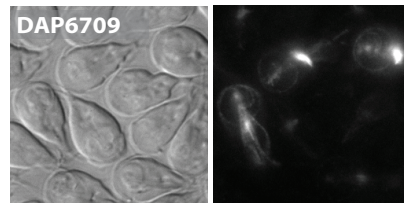

**DAP6709**  
novel

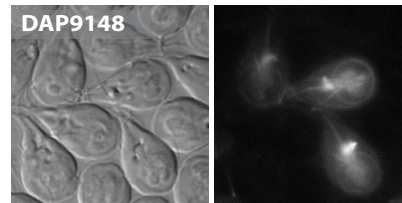

**DAP9148**  
SHIPPO repeat

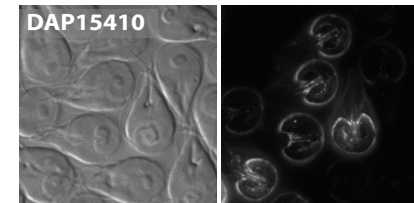

**DAP15410**  
Ser/Thr kinase

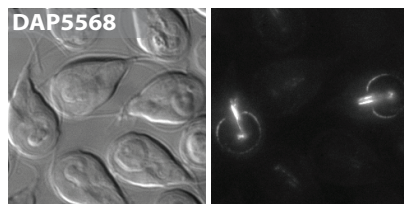

**DAP5568**  
DUF866

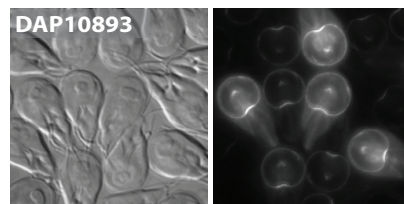

**DAP10893**  
Nek kinase

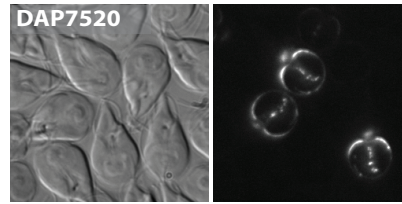

**DAP7520**  
novel

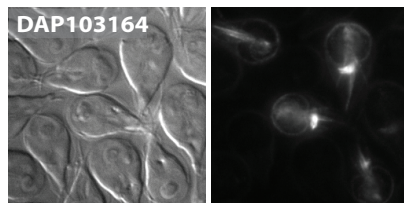

**DAP103164**  
SHIPPO repeat

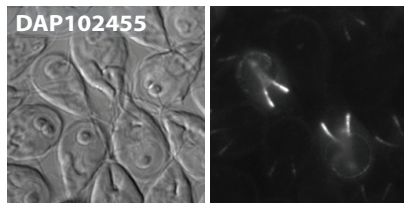

**DAP102455**  
kinesin-6

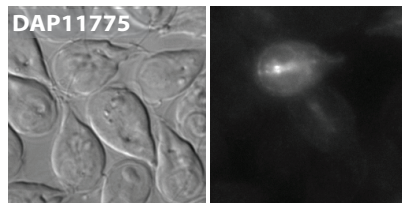

**DAP11775**  
Nek kinase
